# Supplementary material for: Tenacity of Animal Disease Viruses on Wood Surfaces Relevant to Animal Husbandry
Source: MDPI journal article supplement (doi:10.3390/v16050789), 2024-05-15
Supplement: s1 [file s1]

**Table S1.** Residual titre in log<sub>10</sub>TCID<sub>50</sub>/mL of EV-E on germ carriers over time and with three replicates each.

|                    | Day 0 | Day 3 | Day 7 | Day 14 | Day 28 | Day 42 | Day 56 | Day 84 | Day 112 |
|--------------------|-------|-------|-------|--------|--------|--------|--------|--------|---------|
| <b>Spruce</b>      | 8.00  | 7.33  | 7.00  | 7.00   | 6.67   | 5.83   | 6.33   | 5.67   | 4.17    |
|                    | 7.67  | 7.33  | 7.00  | 7.00   | 6.67   | 6.00   | 6.00   | 4.67   | 4.00    |
|                    | 7.50  | 7.00  | 7.33  | 7.00   | 6.33   | 6.33   | 6.00   | 4.50   | 2.83    |
| <b>Pine</b>        | 6.50  | 7.17  | 6.83  | 6.83   | 6.50   | 6.33   | 5.83   | 3.50   | 4.50    |
|                    | 7.33  | 7.67  | 7.17  | 7.50   | 6.67   | 6.33   | 5.50   | 5.83   | 2.67    |
|                    | 7.33  | 7.33  | 7.50  | 7.00   | 7.17   | 7.00   | 6.00   | 4.83   | 4.17    |
| <b>Poplar</b>      | 7.67  | 7.50  | 7.67  | 7.50   | 7.50   | 6.50   | 7.00   | 6.17   | 5.83    |
|                    | 7.83  | 7.50  | 7.17  | 7.17   | 6.67   | 7.17   | 6.50   | 7.00   | 5.83    |
|                    | 7.67  | 7.33  | 7.67  | 7.33   | 7.17   | 7.17   | 7.33   | 6.17   | 5.00    |
| <b>Beech</b>       | 7.83  | 7.50  | 7.17  | 7.00   | 6.67   | 6.17   | 5.83   | 5.17   | 4.33    |
|                    | 7.33  | 7.33  | 7.00  | 7.67   | 6.17   | 6.17   | 6.00   | 5.00   | 3.33    |
|                    | 7.50  | 6.83  | 7.33  | 6.83   | 6.33   | 6.00   | 6.00   | 5.00   | 4.00    |
| <b>Douglas fir</b> | 6.17  | 4.50  | 4.83  | ≤ 3.33 | 3.83   | ≤ 1.50 | ≤ 1.50 | ≤ 1.50 | ≤ 1.50  |
|                    | 7.17  | 4.17  | 4.67  | 4.17   | ≤ 1.50 | ≤ 1.50 | ≤ 1.50 | ≤ 1.50 | ≤ 1.50  |
|                    | 6.67  | 4.83  | 4.50  | ≤ 2.83 | ≤ 1.67 | ≤ 1.50 | ≤ 1.50 | ≤ 1.50 | ≤ 1.50  |
| <b>Steel</b>       | 5.83  | 7.50  | 7.67  | 5.33   | 7.67   | 7.50   | 7.33   | 7.17   | 7.50    |
|                    | 4.67  | 4.67  | 4.83  | 5.17   | 7.50   | 7.33   | 7.00   | 7.00   | 6.83    |
|                    | 4.83  | 6.83  | 6.67  | 4.83   | 4.67   | 7.50   | 7.17   | 7.00   | 7.50    |
| <b>Steel*</b>      | 5.67  | 4.67  | 4.33  | ≤ 3.33 | 2.50   | ≤ 1.67 | ≤ 1.67 | ≤ 1.50 | ≤ 1.50  |
|                    | 5.00  | 4.83  | 4.67  | 3.83   | 3.50   | ≤ 2.33 | ≤ 1.50 | ≤ 1.50 | ≤ 1.50  |
|                    | 5.17  | 4.67  | 4.17  | 3.67   | 3.00   | ≤ 2.33 | ≤ 1.50 | ≤ 1.50 | ≤ 1.50  |

\* completely dried in a desiccator and then stored airtightly sealed

|                                  |      |      |      |                                  |      |      |      |
|----------------------------------|------|------|------|----------------------------------|------|------|------|
| <b>Initial titre<sup>1</sup></b> | 7.67 | 7.67 | 7.88 | <b>Initial titre<sup>2</sup></b> | 8.17 | 7.67 | 8.50 |
|----------------------------------|------|------|------|----------------------------------|------|------|------|

<sup>1</sup> Initial titre in suspension on the day of infection; virus used for all wood carriers and steel

<sup>2</sup> Initial titre in suspension on the day of infection; virus used for steel\*

**Table S2.** Residual titre in log<sub>10</sub>TCID<sub>50</sub>/mL of NDV on germ carriers over time and with three replicates each.

|                    | Day 0 | Day 3  | Day 5  | Day 10 | Day 15 | Day 20 | Day 25 | Day 30 | Day 35 |
|--------------------|-------|--------|--------|--------|--------|--------|--------|--------|--------|
| <b>Spruce</b>      | 6.83  | 4.17   | 2.50   | 2.67   | ≤ 1.50 | ≤ 1.50 | ≤ 1.50 | ≤ 1.50 | ≤ 1.50 |
|                    | 5.83  | ≤ 3.67 | ≤ 2.00 | ≤ 1.50 | ≤ 1.50 | ≤ 1.50 | ≤ 1.50 | ≤ 1.50 | ≤ 1.50 |
|                    | 5.83  | 4.50   | ≤ 1.50 | ≤ 1.50 | ≤ 1.50 | ≤ 1.50 | ≤ 1.50 | ≤ 1.50 | ≤ 1.50 |
| <b>Pine</b>        | 4.33  | ≤ 3.33 | ≤ 1.50 | ≤ 1.50 | ≤ 1.50 | ≤ 1.50 | ≤ 1.50 | ≤ 1.50 | ≤ 1.50 |
|                    | 5.00  | ≤ 2.50 | ≤ 1.50 | ≤ 1.50 | ≤ 1.50 | ≤ 1.50 | ≤ 1.50 | ≤ 1.50 | ≤ 1.50 |
|                    | 4.67  | ≤ 2.50 | ≤ 1.50 | ≤ 1.50 | ≤ 1.50 | ≤ 1.50 | ≤ 1.50 | ≤ 1.50 | ≤ 1.50 |
| <b>Poplar</b>      | 8.00  | 6.33   | 4.67   | ≤ 1.67 | 3.83   | 3.00   | ≤ 1.83 | ≤ 1.50 | ≤ 1.50 |
|                    | 6.83  | 5.00   | 3.83   | ≤ 1.67 | ≤ 1.50 | ≤ 1.50 | ≤ 1.50 | ≤ 1.50 | ≤ 1.50 |
|                    | 7.17  | 5.33   | 4.83   | 3.83   | 3.17   | ≤ 2.33 | ≤ 1.50 | ≤ 1.50 | ≤ 1.50 |
| <b>Beech</b>       | 5.67  | 4.00   | ≤ 3.17 | 4.33   | 3.00   | ≤ 1.50 | ≤ 1.50 | ≤ 1.50 | ≤ 1.50 |
|                    | 5.67  | ≤ 3.67 | ≤ 3.17 | ≤ 2.33 | ≤ 1.50 | ≤ 1.50 | ≤ 1.50 | ≤ 1.50 | ≤ 1.50 |
|                    | 5.67  | 4.00   | 4.00   | ≤ 2.33 | ≤ 1.83 | ≤ 2.33 | ≤ 1.50 | ≤ 1.50 | ≤ 1.50 |
| <b>Douglas fir</b> | 6.83  | 4.67   | ≤ 3.50 | ≤ 2.00 | ≤ 1.50 | ≤ 1.50 | ≤ 1.50 | ≤ 1.50 | ≤ 1.50 |
|                    | 6.67  | 4.33   | ≤ 3.00 | ≤ 2.00 | ≤ 1.50 | ≤ 1.50 | ≤ 1.50 | ≤ 1.50 | ≤ 1.50 |
|                    | 6.67  | 4.50   | ≤ 2.50 | ≤ 1.50 | ≤ 1.50 | ≤ 1.50 | ≤ 1.50 | ≤ 1.50 | ≤ 1.50 |
| <b>Steel</b>       | 8.00  | 6.17   | 6.17   | 5.33   | 4.00   | ≤ 2.33 | 3.00   | ≤ 2.00 | ≤ 1.67 |
|                    | 7.83  | 7.00   | 6.33   | 5.67   | 4.50   | 2.83   | 2.83   | 3.00   | ≤ 2.00 |
|                    | 8.00  | 6.33   | 6.83   | 5.17   | 3.83   | 3.83   | ≤ 2.50 | 2.83   | ≤ 1.67 |
| <b>Steel*</b>      | 7.50  | 7.50   | 7.33   | 7.33   | 7.50   | 7.33   | 7.67   | 7.17   | 7.00   |
|                    | 8.00  | 7.50   | 7.33   | 7.50   | 7.33   | 7.33   | 7.33   | 7.17   | 7.00   |
|                    | 7.50  | 7.67   | 7.67   | 7.50   | 7.50   | 7.50   | 7.67   | 7.67   | 7.17   |

\* completely dried in a desiccator and then stored airtightly sealed

|                                  |      |      |      |
|----------------------------------|------|------|------|
| <b>Initial titre<sup>1</sup></b> | 8.50 | 9.00 | 9.00 |
|----------------------------------|------|------|------|

<sup>1</sup> Initial titre in suspension on the day of infection; virus used for all carriers
